# Supplementary material
Source: publisher figshare collection journal article supplement (https://tandf.figshare.com/articles/dataset/_/27200668)
Supplement: Supplementary file 1 [file 1]

**Appendix II. List of semi-structured questions for the interviews**

| **Groups/criteria** | **Questions for interviews** | **Results of interviews** | | **Conclusions** |
| --- | --- | --- | --- | --- |
| **Person/s acted as DM legislative managers and responsible for instructing the implementation of DRR and CCA activities** | | | | |
| - Provincial secretariat - Pidie Secretariat - Aceh Besar Secretariat | 1. How are you involved in Disaster Risk Reduction (DRR) and Climate Change Adaptation (CCA) activities? 2. Since Aceh is vulnerable not only to earthquakes and tsunamis, but also to climate-related hazards (such as floods, coastal erosions, tidal floods, cyclones, landslides, and droughts) which are currently more dominant in the province. The SFDRR includes climatic hazards in DRR activities. Are climate related hazards integrated into DRR programs or activities in Aceh? Which agencies are involved in DRR activities and CCA activities? Who is the lead agency or agencies? Please mention the types of activities they are normally involved in for DRR and CCA activities. | ***Understanding disaster risk***   - Risk assessment often focuses solely on hazards, neglecting socioeconomic vulnerabilities, - There is a lack of comprehensive risk assessment that considers all elements of risk (hazard, vulnerability, and capacity), - Inadequate attention is given to assessing environmental vulnerabilities resulting from disaster events, - Inadequate risk assessment on climate change-related risks, - There is a lack of community understanding regarding the impacts of climate change on their lives, - Inadequate dissemination of risk assessment results to the public and authorities, | | - There is limited sharing of risk assessment results with the public and policy-makers, - DRR decentralisation poses challenges for implementing DRR activities due to a lack of skilled personnel, funds, and other technical support facilities at the local level, - Insufficient allocation of DRR funds at the local level also hinders the implementation of DRR activities. |
| **Persons/agencies responsible for legalising and supervising the utilisation of DM budgets** | |  |  | |
| - Provincial House Representatives - Aceh Besar House Representative - Pidie House Representative | 1. How are you involved in legalising and supervising budget use for DM programs? 2. Are there regulations that coordinate with some DM actors such as local civil society and indigenous communities to support DRR activities financially? If so, how are these regulations implemented and what are the challenges in providing DRR funds? 3. What role do local governments play in allocating necessary resources, including finances and logistics for both structural and non-structural DRR development at all government levels? Please provide your explanations on the progress made so far and the challenges faced. 4. What role do the government and relevant agencies play in developing disaster insurance to reduce financial losses resulting from disasters? Please provide your explanations on the progress made so far and the challenges faced. 5. Are there any regulations related to social safety net mechanisms to empower and assist communities affected by disasters as a long-term solution in the post-disaster phase? What progress has been made so far and what are the challenges? | ***Strengthening disaster risk governance to manage disaster risk***   - Decentralisation of DRR results in insufficient financial, technical, and human resource capabilities. | |  |
| **Persons/agencies acted as DM executive managers and responsible for commanding, implementing, and coordinating DRR and CCA activities related to the four priorities for action of SFDRR** | |  |  | |
| - Aceh Disaster Management Agency (BPBA) - Aceh Besar Disaster Management Agency (BPBD) - Pidie Disaster Management Agency (BPBD) - Ministry of Environment and Forestry (Provincial DLHK) | 1. How are you involved in Disaster Risk Reduction (DRR) and Climate Change Adaptation (CCA) activities? 2. Since Aceh is vulnerable not only to earthquakes and tsunamis, but also to climate-related hazards (such as floods, coastal erosions, tidal floods, cyclones, landslides, and droughts) which are currently more dominant in the province. The SFDRR includes climatic hazards in DRR activities. Are climate related hazards integrated into DRR programs or activities in Aceh? Which agencies are involved in DRR activities and CCA activities? Who is the lead agency or agencies? Please mention the types of activities they are normally involved in for DRR and CCA activities.   **Priority 1: understanding disaster risk**   1. As a DM manager, how is the progress of understanding disaster risks among DM actors (e.g. governments, private sectors and societies) in Aceh? Do they know the risks of disasters in their respective areas in Aceh? If so, how do they know? 2. So far, what is your role (BPBA/BPBDs) in enhancing disaster risk knowledge among relevant actors, including the community? Please mention specific activities related to improving disaster risk knowledge among these actors. What progress has been made so far? Are there any challenges you are facing? Please mention them. 3. Do all DM actors involved understand all risk elements (Hazards, Vulnerabilities and Capacities), including hazard exposure to the environment and humans, as well as the characteristics of hazards? If so, how do they know? What is your role (BPBA/BPBDs) in enhancing their understanding of these risk elements? 4. Do the relevant DM and CCA actors, including communities, recognise the impacts of climate change-related hazards in their locations? If so, how do they determine this, and what actions do they take to adapt or adjust to these impacts? 5. How do DLHK, BPBA, and BPBDs contribute to increasing the understanding of climate change impacts among relevant actors, including communities in their areas? What progress has been achieved thus far, and what challenges have been encountered? Please provide details. 6. When was the last disaster risk assessment conducted? How often is it updated? Who was involved in the assessment activities? Was the community involved in the assessment? What progress has been made so far? What are the challenges? 7. What about disseminating and exchanging location-based disaster risk information between decision makers, the general public, and communities at risk? Who is/are responsible for disseminating and exchanging risk information? How often do they do it? What progress has been made so far? What are the challenges? 8. Is there any information conveyed by the government or relevant agencies on possible post-disaster losses on economic, social, health, and environmental impacts as a result of exposure to common hazards in Aceh to the general public? If yes, please mention what agency/agencies! How do they do it? What progress has been made so far? What are the challenges? 9. Are there any agencies responsible for promoting accurate and reliable access to data and information about risks using GIS or other ICTs to improve measurement, collection, analysis and dissemination tools and methods? If so, please mention what agency/es? What progress has been made so far? What are the challenges? 10. How has the integration of disaster risk knowledge, including prevention, mitigation, preparedness, response, recovery and rehabilitation, been incorporated into formal education so far? Please discuss the progress that has been made and the challenges that remain. 11. How are community-based organisations involved in disseminating disaster risk information to local communities? Are there any government agencies responsible for this task? Please discuss the progress that has been made and the challenges faced? 12. In your opinion, what potential solutions and suggestions could improve disaster risk knowledge among DM actors, including communities in Aceh?   **Priority 2: Strengthening disaster risk governance to manage disaster risk**   1. What progress has been made thus far in mainstreaming DRR into all sectors (government and private agencies) in Aceh, followed by establishing relevant regulations to define their roles and responsibilities? What challenges have been faced? 2. What progress has been made in implementing local DRR strategies and plans in Aceh, complete with targets and indicators to prevent or reduce existing and potential risks? What challenges have been encountered? 3. How can the Aceh government and relevant agencies ensure the proper establishment and implementation of local regulations related to land use, urban planning, building codes, and environmental management, with a focus on disaster risk management principles? Are the punishments in place for noncompliance? 4. How often are monitoring, evaluation, and reporting activities regarding DRR progress conducted in Aceh? How are these reports communicated to legislative authorities and the public, and what challenges have been faced by the responsible agencies thus far? 5. How are community representatives engaged in the decision-making process of DRR plans and activities in Aceh? What progress has been made, and what challenges exist in engaging the community in these activities? 6. Are there any local regulations in place to strengthen coordination between central and provincial governments and related agencies in Aceh for implementing DRR activities? If so, what are the challenges faced in strengthening this coordination? 7. Are there regulations that coordinate with certain DM actors, such as local civil society and indigenous communities, to provide financial support for DRR activities? If so, how are these regulations implemented? What are the challenges in providing DRR funds?, and what are the challenges in coordinating with these actors? 8. What role do government or related agencies play in promoting disaster risk management by giving certifications and awards to local areas that have implemented DRR measures in their respective locations? 9. Are there any government regulations or policies regarding the relocation of population settlements in disaster-prone zones? If so, how do these regulations work? What challenges does the government face in relocating communities? 10. In your opinion, what potential solutions, suggestions, or recommendations could enhance disaster risk governance and manage risk in Aceh?   **Priority 3: Investing in disaster risk reduction for resilience**   1. What about the role of local governments in allocating the necessary resources, including finance and logistics, related to both structural and non-structural DRR development at all government levels? Please provide your explanations. What progress has been made thus far, and what challenges are being faced? 2. How does the government and relevant agencies contribute to the development of disaster insurance to mitigate financial losses resulting from disasters? Please provide your explanations. What progress has been achieved, and what challenges are currently being encountered? 3. What is the role of the government and relevant agencies in strengthening and investing in disaster-resilient infrastructure for public and private sectors (e.g. schools and hospitals), by implementing proper structural and non-structural preventive measures (e.g., proper design and construction, standardization of building materials and building maintenance)? Please provide your explanations. What progress has been made so far, what are the challenges? 4. What is the role of the government and relevant agencies in promoting disaster risk resilience in the workplace through structural and non-structural measures? Please provide your explanations and examples. What progress has been made so far, and what are the challenges? 5. What about the role of the government and relevant agencies in integrating disaster risk assessments (e.g. land use policies, urban planning, land degradation assessment and housing) into provincial development plans? Please provide your explanations. What progress has been made so far, and what are the challenges? 6. What is the role of local government and relevant agencies in integrating disaster risk assessments and mapping (considering mountains, rivers, coastal floodplain areas, dry and wetlands) into rural development planning and preserving ecosystem functions to reduce risks? Please provide your explanations, and what progress has been made so far, and what are the challenges? 7. What is the role of local government and relevant agencies in promoting the creation of building codes for rural settlements (considering the local context) at the local level? What progress has been made so far, and what are the challenges? 8. What is the role of local government and relevant agencies in establishing social safety net mechanisms to empower and assist communities affected by disasters as a long-term solution in the post-disaster phase? What progress has been made so far and what are the challenges? 9. What about the role of local government and relevant agencies in managing and addressing human evacuations/exodus in the aftermath of disasters! What progress has been made so far? What are the challenges? 10. How do local government and relevant agencies strengthen the management of ecosystems and sustainable management of the environment and natural resources by considering DRR principles? What progress has been made, and what are the challenges? Please provide examples. 11. How do local government and relevant agencies enhance business resilience and protect livelihoods and productive assets when they are under threat from disaster? What progress has been made, and what are the challenges? Please provide examples. 12. In your opinion, what are the potential solutions, suggestions, or recommendations to enhance DRR investment for resilience in Aceh?   **Priority 4: Enhancing disaster preparedness for effective response and to “Build Back Better” in recovery, rehabilitation and reconstruction.**   1. Are the policies, plans, and programs related to preparedness and contingencies periodically updated? If yes, how often are they conducted? If so, how often are they updated? If not, why? what progress has been made so far? What are the challenges? 2. What is the role of local government and relevant agencies in developing and strengthening a people-centered MHEWS (multi-hazard EWS)? Has the people-centered MHEWS been developed or established in local areas? If yes, how is the system operated? Please provide examples. If not, why? 3. How do the authority, DM actors, and other relevant actors communicate with local people during an emergency? what is the role of local government and relevant agencies in utilising locally-based hazards monitoring, predicting and disseminating? What progress has been made so far? What are the challenges? 4. What is the role of local government and relevant agencies in ensuring the availability of basic needs and services such as water, transportation and telecommunications infrastructure, educational facilities, hospitals and other health facilities during and after a disaster? How do governments prepare for adequate basic needs and services availability during disasters? 5. What is the role of local government and relevant agencies in enhancing public awareness to stockpile necessary materials in preparation for an emergency situation? How can local people be encouraged to prepare for stockpiling? What progress has been made so far? What are the challenges? 6. What is the role of local government and relevant agencies in conducting disaster response training for DM actors, communities, and volunteers? How can it be ensured that they are well prepared for emergency response? Are the trainings regularly conducted? How often? What progress has been made so far? What are the challenges? 7. What is the role of local government and relevant agencies in incorporating DRR and management into the post-disaster recovery and rehabilitation phase to develop capacities that can reduce disaster risk in the short, medium and long terms? What progress has been made so far? What are the challenges? 8. Do local government and relevant agencies discuss land use planning, improving structural standards, and sharing expertise and knowledge during post-disaster reviews with relevant actors, institutions, or agencies? If so, what are the results of the discussion? Can you provide examples? If not, why do governments not engaged in these discussions? What progress has been made so far? What are the challenges? 9. Do local government and relevant agencies develop preparedness guidelines for disaster reconstruction efforts, such as land use planning and improving structural standards? If so, do the disaster reconstruction actors adopt the guidelines? Can you provide examples of the adoption? If not, why do governments not provide these guidelines? What progress has been made so far? What are the challenges? 10. Do the local government and relevant agencies consider relocating public facilities to areas outside the risk map in the post-disaster reconstruction process after consulting with qualified relevant agencies/actors? If yes, to what extent has this consideration been implemented? Can you provide examples of public facilities being relocated? If no, why do governments not consider relocating public facilities outside the risk zones? What progress has been made so far, and what are the challenges? 11. Do the provincial government and relevant agencies strengthen the capacity of local/district governments to evacuate people living in disaster-prone areas to safe zones? If yes, please describe specific activities that support and strengthen the capacity of district governments in evacuating people in the aftermath of disasters. 12. Do the local government and relevant agencies establish or develop a mechanism to accurately record the number of fatalities and injuries due to disasters? If yes, can you provide the records? What are the challenges in accurately recording the number of fatalities and injuries due to disasters? 13. What is the role of local government and relevant agencies in providing psychosocial support and mental health services for all victims of trauma during the recovery phase? Do these government or relevant agencies (e.g. health agencies) provide these services? If so, please provide examples. What progress has been made thus far, and what challenges exist? 14. In your opinion, what are some potential solutions, suggestions, or recommendations to enhance disaster preparedness for effective response and improve the BBB (Build Back Better) in the recovery efforts in Aceh? | *Investing in disaster risk reduction for resilience*   - There is a lack of financial support for DRR activities, - There are no contingency funds available.   *Enhancing disaster preparedness for effective response and to "Build Back Better" in recovery, rehabilitation and reconstruction*   - Many disaster preparedness programs have not continued because supporting agencies have stopped their projects, - BBB has not been achieved optimally, as many buildings have been poorly constructed in various areas since the 2004 tsunami. | |  |
| **Persons/agencies involved in monitoring and evaluating, and making reports on DM and CCA activities** | |  | | |
| - Provincial Planning Agency *(Bappeda)* - *Bappeda* Aceh Besar - *Bappeda* Pidie | 1. How are you involved in monitoring, evaluating, and reporting on DM programs? 2. How are activities related to monitoring, evaluating, and reporting on the progress of DRR in Aceh carried out? 3. How frequently are these activities conducted? 4. How is the report communicated and delivered to legislative authorities and the public? 5. What progress has been achieved in DRR activities in Aceh? 6. What challenges has your organisation faced in conducting monitoring, evaluating, and reporting on the progress of DRR in Aceh? |  | |  |
| **Persons/agencies involved in implementing DRR and CCA activities based on the four priorities for action of SFDRR** | |  |  | |
| - Geophysical, Meteorological and Climatological Agency *(BMKG)* - Provincial Health Office (PHO) - Aceh Besar District Health Office (DHO) - Pidie District Health Office (DHO) - Indonesian Inter-citizen Radio *(RAPI)* - Provincial Military Command - Provincial Police Command - Disaster Risk Reduction Forum - Indonesia Red Cross - WALHI - WWF (World Wide Fund for Nature) - WCS (Wildlife Conservation Society) - BKSDA (Natural Resources Conservation Center) - HAKA (Aceh Forest, Nature and Environment Foundation) - TDMRC - UNICEF - UNDP - Aceh Hijau - KARST Aceh - Human Initiative - Syiah Kuala University | 1. How are you involved in Disaster Risk Reduction (DRR) and Climate Change Adaptation (CCA) activities? 2. Since Aceh is not only vulnerable to earthquakes and tsunamis, but also climate-related hazards such as floods, coastal erosions, tidal floods, cyclones, landslides, and droughts, which are currently more predominant in the province. Additionally, SFDRR includes climatic hazards in DRR activities. Are climate-related hazards integrated into DRR programs or activities in Aceh? Which agencies are involved in DRR activities, and which are involved in CCA activities? Who is the lead agency or agencies? Please mention the types of activities they are typically involved in for DRR and CCA activities.   **Priority 1: understanding disaster risk**   1. In your opinion, how is the progress of understanding disaster risks among DM actors (e.g. governments, private sectors and societies) in Aceh? Do they know the risks of disasters in their respective areas in Aceh? If so, how do they know? 2. So far, what is your role in enhancing disaster risk knowledge among relevant actors, including the community? Please mention specific activities related to improving disaster risk knowledge among these actors. What progress has been made so far? Are there any challenges you are facing? Please mention them. 3. Do all DM actors involved understand all risk elements (Hazards, Vulnerabilities and Capacities), including hazard exposure to the environment and humans, as well as the characteristics of hazards? If so, how do they know? 4. Do the relevant DM and CCA actors, including communities, recognise the impacts of climate change-related hazards in their locations? If so, how do they determine this, and what actions do they take to adapt or adjust to these impacts? 5. How do you contribute to increasing the understanding of climate change impacts among relevant actors, including communities in their areas? What progress has been achieved thus far, and what challenges have been encountered? Please provide details. 6. When was the last disaster risk assessment conducted? How often is it updated? Who was involved in the assessment activities? Was the community involved in the assessment? What progress has been made so far? What are the challenges? 7. What about disseminating and exchanging location-based disaster risk information between decision makers, the general public, and communities at risk? Who is/are responsible for disseminating and exchanging risk information? How often do they do it? What progress has been made so far? What are the challenges? 8. Is there any information conveyed by the government or relevant agencies on possible post-disaster losses on economic, social, health, and environmental impacts as a result of exposure to common hazards in Aceh to the general public? If yes, please mention what agency/agencies! How do they do it? What progress has been made so far? What are the challenges? 9. Are there any agencies responsible for promoting accurate and reliable access to data and information about risks using GIS or other ICTs to improve measurement, collection, analysis and dissemination tools and methods? If so, please mention what agency/es? What progress has been made so far? What are the challenges? 10. How has the integration of disaster risk knowledge, including prevention, mitigation, preparedness, response, recovery and rehabilitation, been incorporated into formal education so far? Please discuss the progress that has been made and the challenges that remain. 11. How are community-based organisations involved in disseminating disaster risk information to local communities? Are there any government agencies responsible for this task? Please discuss the progress that has been made and the challenges faced? 12. In your opinion, what potential solutions and suggestions could improve disaster risk knowledge among DM actors, including communities in Aceh?   **Priority 2: Strengthening disaster risk governance to manage disaster risk**   1. What progress has been made thus far in mainstreaming DRR into all sectors (government and private agencies) in Aceh, followed by establishing relevant regulations to define their roles and responsibilities? What challenges have been faced? 2. What progress has been made in implementing local DRR strategies and plans in Aceh, complete with targets and indicators to prevent or reduce existing and potential risks? What challenges have been encountered? 3. How can the Aceh government and relevant agencies ensure the proper establishment and implementation of local regulations related to land use, urban planning, building codes, and environmental management, with a focus on disaster risk management principles? Are the punishments in place for noncompliance? 4. What about the activities related to monitoring and evaluating, and reporting the progress of DRR in Aceh? How often the activity is conducted? How is the report communicated and delivered to legislative or authorities and public? What challenges have been faced by the responsible agency/es, so far? 5. How are community representatives engaged in the decision-making process of DRR plans and activities in Aceh? What progress has been made, and what challenges exist in engaging the community in these activities? 6. Are there any local regulations in place to strengthen coordination between central and provincial governments and related agencies in Aceh for implementing DRR activities? If so, what are the challenges faced in strengthening this coordination? 7. Are there regulations that coordinate with certain DM actors, such as local civil society and indigenous communities, to provide financial support for DRR activities? If so, how are these regulations implemented? What are the challenges in providing DRR funds?, and what are the challenges in coordinating with these actors? 8. What role do government or related agencies play in promoting disaster risk management by giving certifications and awards to local areas that have implemented DRR measures in their respective locations? 9. Are there any government regulations or policies regarding the relocation of population settlements in disaster-prone zones? If so, how do these regulations work? What challenges does the government face in relocating communities? 10. In your opinion, what potential solutions, suggestions, or recommendations could enhance disaster risk governance and manage risk in Aceh?   **Priority 3: Investing in disaster risk reduction for resilience**   1. What about the role of local governments in allocating the necessary resources, including finance and logistics, related to both structural and non-structural DRR development at all government levels? Please provide your explanations. What progress has been made thus far, and what challenges are being faced? 2. How does the government and relevant agencies contribute to the development of disaster insurance to mitigate financial losses resulting from disasters? Please provide your explanations. What progress has been achieved, and what challenges are currently being encountered? 3. What is the role of the government and relevant agencies in strengthening and investing in disaster-resilient infrastructure for public and private sectors (e.g. schools and hospitals), by implementing proper structural and non-structural preventive measures (e.g., proper design and construction, standardization of building materials and building maintenance)? Please provide your explanations. What progress has been made so far, what are the challenges? 4. What is the role of the government and relevant agencies in promoting disaster risk resilience in the workplace through structural and non-structural measures? Please provide your explanations and examples. What progress has been made so far, and what are the challenges? 5. What about the role of the government and relevant agencies in integrating disaster risk assessments (e.g. land use policies, urban planning, land degradation assessment and housing) into provincial development plans? Please provide your explanations. What progress has been made so far, and what are the challenges? 6. What is the role of local government and relevant agencies in integrating disaster risk assessments and mapping (considering mountains, rivers, coastal floodplain areas, dry and wetlands) into rural development planning and preserving ecosystem functions to reduce risks? Please provide your explanations, and what progress has been made so far, and what are the challenges? 7. What is the role of local government and relevant agencies in promoting the creation of building codes for rural settlements (considering the local context) at the local level? What progress has been made so far, and what are the challenges? 8. What is the role of local government and relevant agencies in establishing social safety net mechanisms to empower and assist communities affected by disasters as a long-term solution in the post-disaster phase? What progress has been made so far and what are the challenges? 9. What about the role of local government and relevant agencies in managing and addressing human evacuations/exodus in the aftermath of disasters! What progress has been made so far? What are the challenges? 10. How do local government and relevant agencies strengthen the management of ecosystems and sustainable management of the environment and natural resources by considering DRR principles? What progress has been made, and what are the challenges? Please provide examples. 11. How do local government and relevant agencies enhance business resilience and protect livelihoods and productive assets when they are under threat from disaster? What progress has been made, and what are the challenges? Please provide examples. 12. In your opinion, what are the potential solutions, suggestions, or recommendations to enhance DRR investment for resilience in Aceh?   **Priority 4: Enhancing disaster preparedness for effective response and to “Build Back Better” in recovery, rehabilitation and reconstruction.**   1. Are the policies, plans, and programs related to preparedness and contingencies periodically updated? If yes, how often are they conducted? If so, how often are they updated? If not, why? what progress has been made so far? What are the challenges? 2. What is the role of local government and relevant agencies in developing and strengthening a people-centered MHEWS (multi-hazard EWS)? Has the people-centered MHEWS been developed or established in local areas? If yes, how is the system operated? Please provide examples. If not, why? 3. How do the authority, DM actors, and other relevant actors communicate with local people during an emergency? what is the role of local government and relevant agencies in utilising locally-based hazards monitoring, predicting and disseminating? What progress has been made so far? What are the challenges? 4. What is the role of local government and relevant agencies in ensuring the availability of basic needs and services such as water, transportation and telecommunications infrastructure, educational facilities, hospitals and other health facilities during and after a disaster? How do governments prepare for adequate basic needs and services availability during disasters? 5. What is the role of local government and relevant agencies in enhancing public awareness to stockpile necessary materials in preparation for an emergency situation? How can local people be encouraged to prepare for stockpiling? What progress has been made so far? What are the challenges? 6. What is the role of local government and relevant agencies in conducting disaster response training for DM actors, communities, and volunteers? How can it be ensured that they are well prepared for emergency response? Are the trainings regularly conducted? How often? What progress has been made so far? What are the challenges? 7. What is the role of local government and relevant agencies in incorporating DRR and management into the post-disaster recovery and rehabilitation phase to develop capacities that can reduce disaster risk in the short, medium and long terms? What progress has been made so far? What are the challenges? 8. Do local government and relevant agencies discuss land use planning, improving structural standards, and sharing expertise and knowledge during post-disaster reviews with relevant actors, institutions, or agencies? If so, what are the results of the discussion? Can you provide examples? If not, why do governments not engaged in these discussions? What progress has been made so far? What are the challenges? 9. Do local government and relevant agencies develop preparedness guidelines for disaster reconstruction efforts, such as land use planning and improving structural standards? If so, do the disaster reconstruction actors adopt the guidelines? Can you provide examples of the adoption? If not, why do governments not provide these guidelines? What progress has been made so far? What are the challenges? 10. Do the local government and relevant agencies consider relocating public facilities to areas outside the risk map in the post-disaster reconstruction process after consulting with qualified relevant agencies/actors? If yes, to what extent has this consideration been implemented? Can you provide examples of public facilities being relocated? If no, why do governments not consider relocating public facilities outside the risk zones? What progress has been made so far, and what are the challenges? 11. Do the provincial government and relevant agencies strengthen the capacity of local/district governments to evacuate people living in disaster-prone areas to safe zones? If yes, please describe specific activities that support and strengthen the capacity of district governments in evacuating people in the aftermath of disasters. 12. Do the local government and relevant agencies establish or develop a mechanism to accurately record the number of fatalities and injuries due to disasters? If yes, can you provide the records? What are the challenges in accurately recording the number of fatalities and injuries due to disasters? 13. What is the role of local government and relevant agencies in providing psychosocial support and mental health services for all victims of trauma during the recovery phase? Do these government or relevant agencies (e.g. health agencies) provide these services? If so, please provide examples. What progress has been made thus far, and what challenges exist? 14. In your opinion, what are some potential solutions, suggestions, or recommendations to enhance disaster preparedness for effective response and improve the BBB (Build Back Better) in the recovery efforts in Aceh? |  | |  |
| **Persons/agencies responsible for implementing DRR and CCA activities related to the four priorities for action of SFDRR at village level** | |  |  | |
| - Kajhu village chief - DRR forum representative member in Kajhu village - Destana representative member in Kajhu village - Sukon village chief - DRR forum representative member in Sukon village - Destana representative member in Sukon village | 1. How are you involved in Disaster Risk Reduction (DRR) and Climate Change Adaptation (CCA) activities? 2. Since Aceh is not only vulnerable to earthquakes and tsunamis, but also climate-related hazards such as floods, coastal erosions, tidal floods, cyclones, landslides, and droughts, which are currently more predominant in the province. Additionally, SFDRR includes climatic hazards in DRR activities. Are climate-related hazards integrated into DRR programs or activities in Aceh? Which agencies are involved in DRR activities, and which are involved in CCA activities? Who is the lead agency or agencies? Please mention the types of activities they are typically involved in for DRR and CCA activities.   **Priority 1: understanding disaster risk**   1. In your opinion, how would you assess the progress of understanding disaster risks among disaster management (DM) actors (such as governments, private sectors, and societies) in Aceh? Do they have knowledge of the risks of disasters in their specific areas in Aceh? If so, how did they acquire this knowledge? 2. Do you understand all risk elements (Hazards, Vulnerabilities and Capacities), hazard exposure to the environment and humans, and characteristics of hazards? If so, how do you know? 3. When it comes to climate-related hazards, are you aware of the impacts of climate-change related hazards in your locations? If yes, how do you know? What actions do you take to adapt or adjust to climate change impacts? 4. How is location-based disaster risk information disseminated and exchanged between decision-makers, the general public, and communities at risk? Who is responsible for this task? How frequently is it done? What progress has been made so far? What challenges exist? 5. Does the government or relevant agencies provide information on potential post-disaster losses in economic, social, health, and environmental impacts due to exposure to common hazards in Aceh to general public? If so, please mention the agencies responsible and how they do it? 6. Are there agencies responsible for ensuring accurate and reliable access to data and information about risks using GIS or other ICTs to enhance measurement, collection, analysis and dissemination tools and methods? If yes, please mention the agency or agencies. What progress has been made so far? What challenges are faced? 7. How are community-based organisations involved in disseminating disaster risk information to local communities? Are there government agencies responsible for this task? What progress has been made so far? What challenges have arisen? 8. In your opinion, what potential solutions and suggestions could enhance disaster risk knowledge among decision-makers, especially in your village and Aceh as a whole?   **Priority 2: Strengthening disaster risk governance to manage disaster risk**   1. What about the activities related to monitoring and evaluating, and reporting the progress of DRR in Aceh? How often are these activities conducted? How is the report communicated and delivered to legislative authorities and the public/villagers? What challenges have the responsible agencies faced so far? 2. How are community representatives engaged in the decision-making process of DRR plans and activities? What progress has been made so far? What are the challenges for engaging the community in these activities? 3. Are there regulations that coordinate with various DM actors, such as local civil society and indigenous communities to support DRR activities financially? If so, how are these regulations implemented? What are the challenges in providing DRR funds and coordinating with these actors? 4. What is the role of the government or related agencies in promoting disaster risk management by giving certifications and awards to local areas that have implemented DRR in their respective locations? 5. Are there any government regulations or policies regarding the relocation of population settlements in disaster-prone zones? If so, how do these regulations work? What challenges does the government face in relocating communities? 6. In your opinion, what potential solutions, suggestions, or recommendations could enhance disaster risk governance to manage risks in your village especially and in Aceh in general?   **Priority 3: Investing in disaster risk reduction for resilience**   1. What is the role of local governments in allocating the necessary resources, including finance and logistics related to structural and non-structural DRR development at all government levels? Please provide your explanations. What progress has been made so far? What are the challenges? 2. What is the role of local government and relevant agencies in mainstreaming disaster risk assessments and mapping (considering mountains, rivers, coastal floodplain areas, dry and wetlands) into rural development planning and preserving ecosystem functions to reduce risks? Please provide your explanations. What progress has been made so far? What are the challenges? 3. What is the role of local government and relevant agencies in encouraging the creation of building codes for rural settlements (considering the local context) at the local level? What progress has been made so far? What are the challenges? 4. What is the role of local government and relevant agencies in establishing social safety net mechanisms to empower and help communities affected by disasters? This is a long-term solution in a post-disaster phase. What progress has been made so far? What are the challenges? 5. What is the role of local government and relevant agencies in managing and addressing human evacuations/exodus in the aftermath of disasters? What progress has been made so far? What are the challenges? 6. In your opinion, what are the potential solutions, suggestions, or recommendations to enhance DRR investment for resilience in your village, especially in Aceh in general?   **Priority 4: Enhancing disaster preparedness for effective response and to “Build Back Better” in recovery, rehabilitation and reconstruction.**   1. What is the role of local government and relevant agencies in developing and strengthening a people-centered MHEWS (multi-hazard EWS)? Has a people-centered MHEWS been developed or established in local areas? If so, how is the system operated? Please provide examples. If not, why not? 2. How do authorities, DM actors, and other relevant actors communicate with local people during an emergency? What is the role of local government and relevant agencies in utilising locally-based hazards monitoring, predicting, and disseminating information? What progress has been made so far, and what are the challenges? 3. What is the role of local government and relevant agencies in enhancing public awareness to stockpile necessary materials in preparation for an emergency situation? How can local people be encouraged to prepare for stockpiling? What progress has been made so far, and what are the challenges? 4. What is the role of local government and relevant agencies in conducting disaster response training for DM actors, communities, and volunteers? How can we ensure they are well-prepared for emergency response? Are the trainings regularly conducted? How often? What progress has been made so far, and what are the challenges? 5. Do provincial governments and relevant agencies strengthen the capacity of local/district governments to evacuate people living in disaster-prone areas to safe zones? If so, please describe specific activities that supports and strengthens the district government’s capacity in evacuating people in the aftermath of disasters. 6. Do local governments and relevant agencies establish or develop a mechanism to record the accurate number of mortalities and morbidities due to disasters? If so, can you provide the record? What are the challenges for accurately recording the number of mortalities and morbidities due to disasters? 7. What is the role of local government and relevant agencies in providing psychosocial support and mental health services for all traumatic victims in the recovery phase? Do the government or relevant agencies (e.g. health agencies) provide these services? If so, please provide examples? What progress has been made so far, and what are the challenges? 8. In your opinion, what are the potential solutions, suggestions, or recommendations to enhance disaster preparedness for effective response and improve the BBB (Build Back Better) in the recovery in your village, especially in Aceh in general? |  | |  |
